# Supplementary figures and images for: Resistome and Genome Analysis of an Extensively Drug-Resistant Klebsiella michiganensis KMIB106: Characterization of a Novel KPC Plasmid pB106-1 and a Novel Cointegrate Plasmid pB106-IMP Harboring blaIMP-4 and blaSHV-12
Source: MDPI journal article supplement (doi:10.3390/antibiotics12091463), 2023-09-20

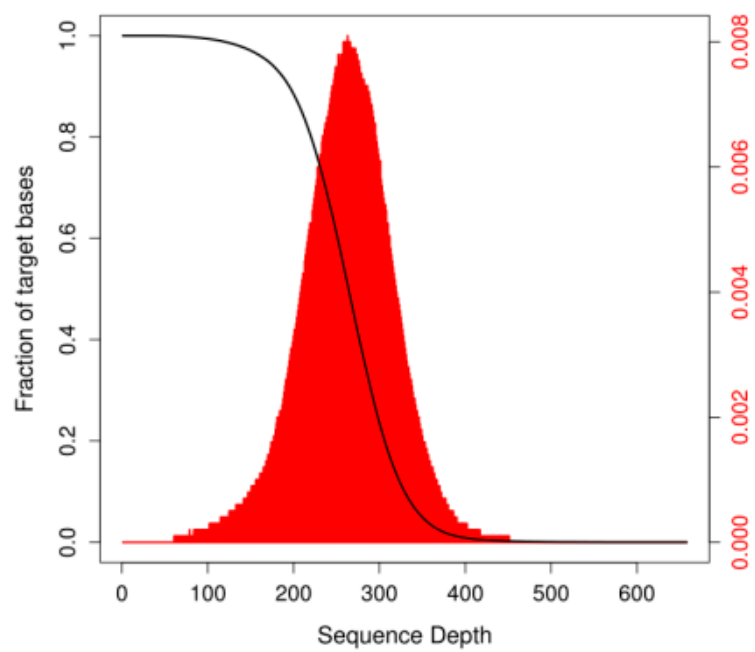

Figure S1. Sequencing depth distribution map.

Supplement: s1 [file s1]
